# Supplementary material for: Identification of key genes and biological pathways associated with vascular aging in diabetes based on bioinformatics and machine learning
Source: publisher site journal article supplement (doi:10.18632/aging.205870), 2024-05-27
Supplement: Supplementary file [file aging-v16i11-205870-supplementary-material-SD1.pdf]

## SUPPLEMENTARY TABLE

**Supplemental Table 1. Identification of 31 diabetic vascular aging-related genes.**

|           |          |         |          |
|-----------|----------|---------|----------|
| Rnf150    | Ndor1    | Mettl9  | Arhgef25 |
| Pfkfb4    | Pi4k2b   | Cpsf1   | Ankrd34a |
| Hist1h2be | Tcea1    | Rps11   | Met      |
| Creb5     | Npm1     | Eif3g   | Dhtkd1   |
| Ly75      | Eif4ebp1 | Phyhd1  | Ruvbl2   |
| Epas1     | Dalrd3   | Snhg1   | Atg3     |
| Pbxip1    | Pnrc2    | Orc2    | Mrpl47   |
| Prepl     | Cyb5b    | Ppp2r3c | Cct2     |
| Frmd6     | Slc19a1  | Foxred2 | Sfxn2    |
| Adcy5     | Ccdc134  | Tfb1m   | Gstz1    |
| Pdgfrl    | Wdr55    | Ptprg   | Hspb2    |
| Podn      | Larp1b   | Mrpl52  | Prdm8    |
| Dmpk      | Polr3g   | Rps3    | Thumpd1  |
